# Supplementary material
Source: PubMed Central journal article supplement (PMC4583329)
Supplement: NIHMS683684-supplement-Suppl.pdf [file NIHMS683684-supplement-Suppl.pdf]

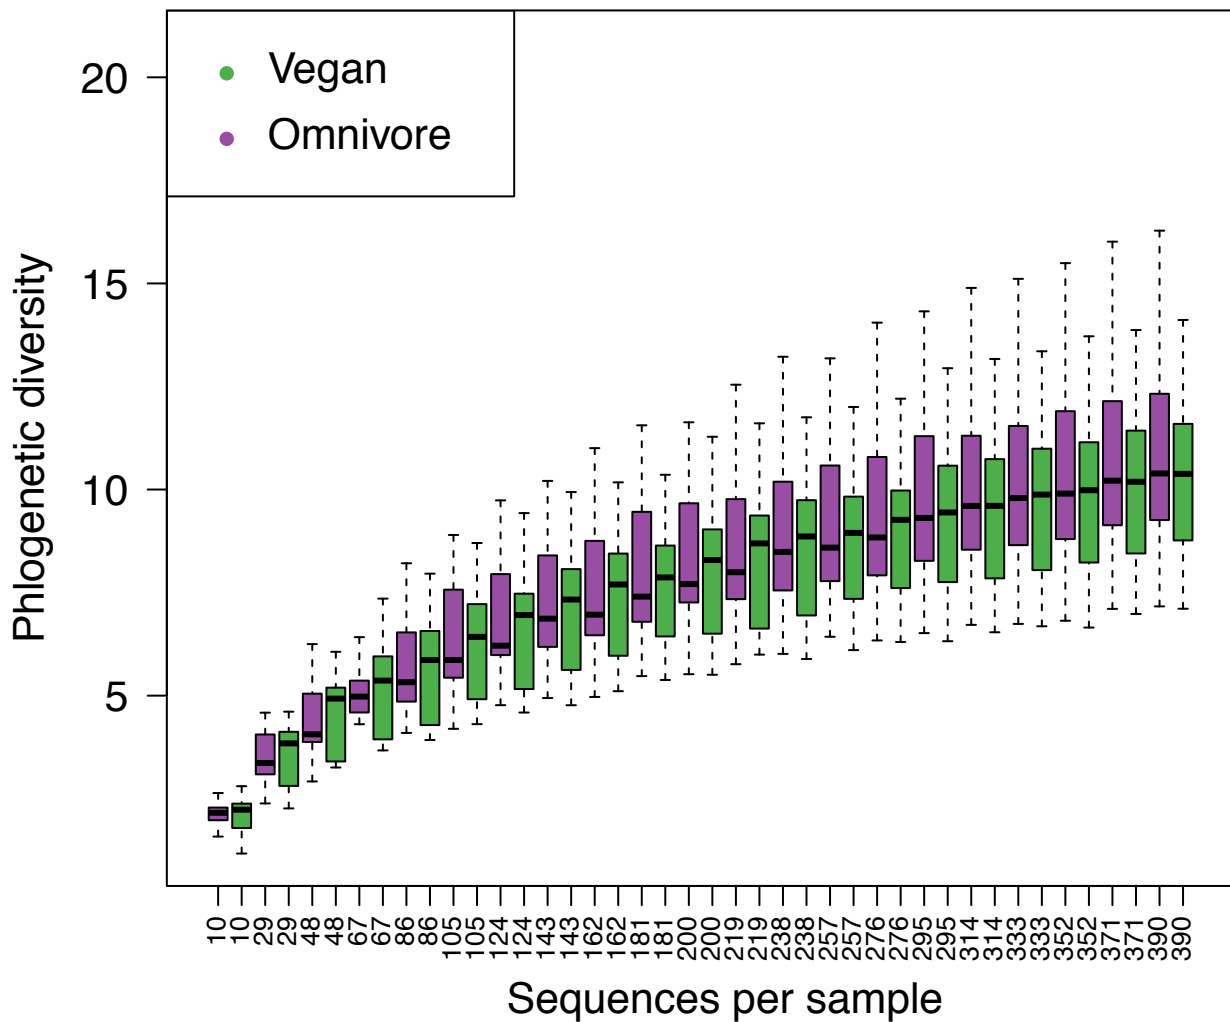

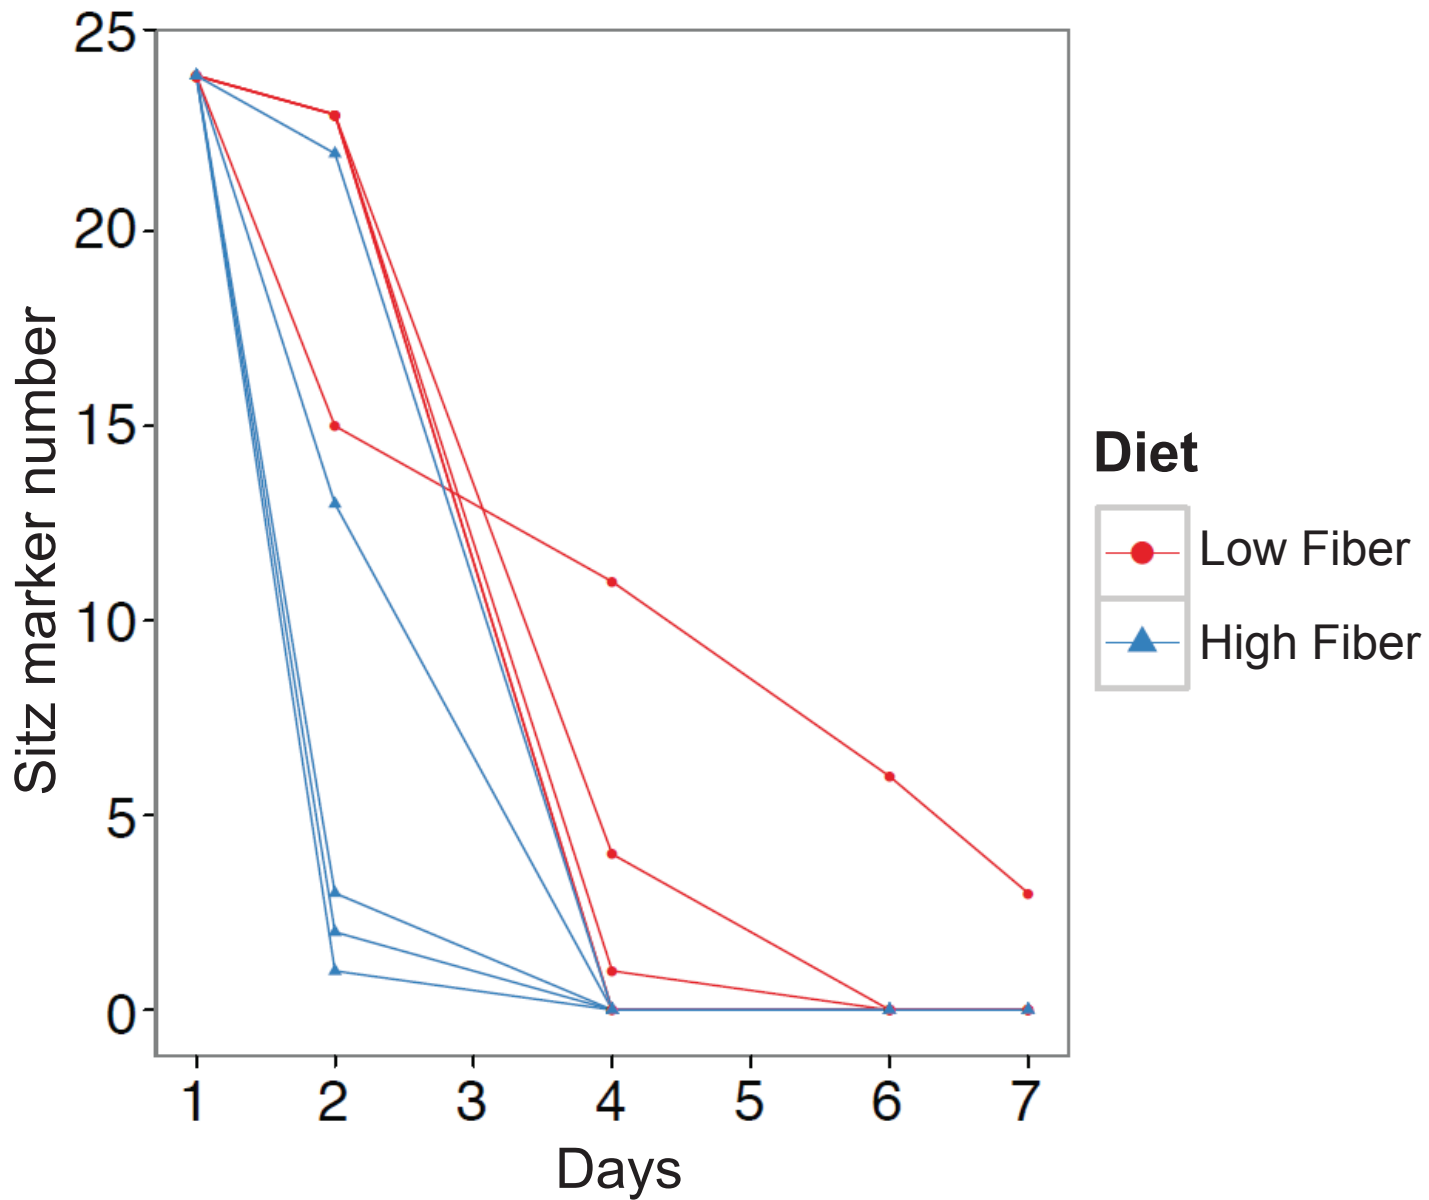

### Low Fiber Diet

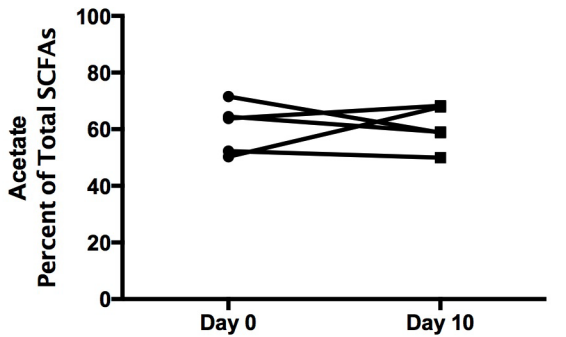

### High Fiber Diet

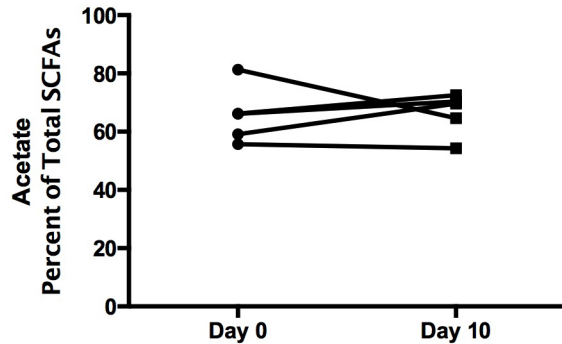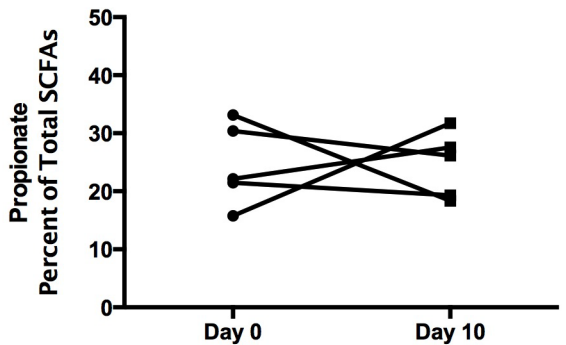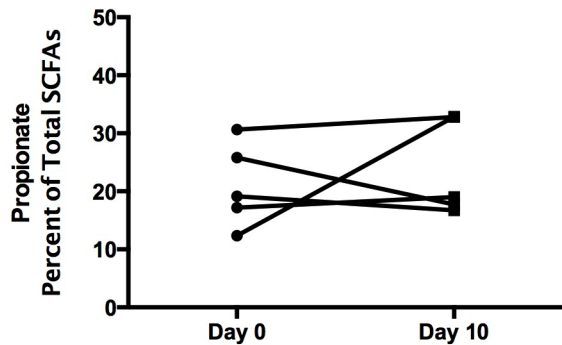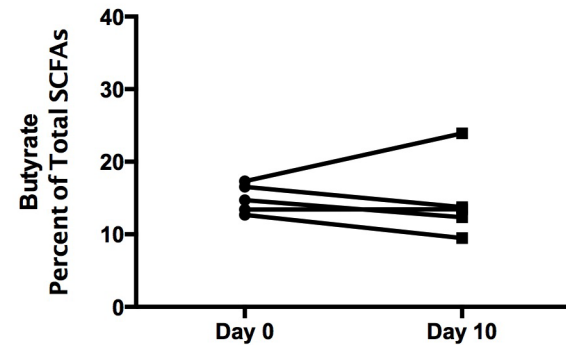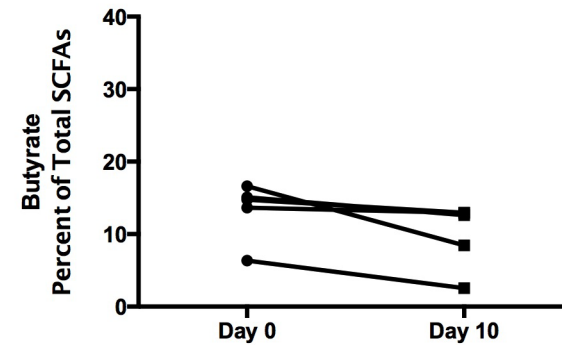

**TABLE S1**

| Micronutrients                            | Vegan (raw value) |        | Omnivore (raw value) |       | Vegan (standardized value) |      | Omnivore (standardized value) |      | P value  | Q value  |
|-------------------------------------------|-------------------|--------|----------------------|-------|----------------------------|------|-------------------------------|------|----------|----------|
|                                           | Mean              | SD     | Mean                 | SD    | Mean                       | SD   | Mean                          | SD   |          |          |
| Animal Protein                            | 0                 | 0      | 60                   | 25    | -1                         | 0.32 | 0.72                          | 0.56 | 2.40E-10 | 3.40E-09 |
| MUFA 16:1 (palmitoleic acid)              | 0.29              | 0.22   | 1.5                  | 0.64  | -1                         | 0.41 | 0.69                          | 0.61 | 5.70E-09 | 4.10E-08 |
| SFA 16:0 (palmitic acid)                  | 6                 | 2.3    | 16                   | 7.2   | -1                         | 0.49 | 0.69                          | 0.56 | 2.10E-08 | 1.00E-07 |
| Cholesterol                               | 0                 | 0      | 310                  | 180   | -0.96                      | 0.41 | 0.66                          | 0.69 | 5.30E-08 | 1.90E-07 |
| PUFA 20:4 (arachidonic acid)              | 0.0016            | 0.0014 | 0.15                 | 0.082 | -0.95                      | 0.31 | 0.66                          | 0.74 | 1.10E-07 | 3.00E-07 |
| Total Conjugated Linoleic Acid (CLA 18:2) | 0.0038            | 0.0033 | 0.18                 | 0.1   | -0.95                      | 0.38 | 0.65                          | 0.73 | 1.30E-07 | 3.10E-07 |
| CLA cis-9, trans-11                       | 0.0018            | 0.0015 | 0.15                 | 0.087 | -0.94                      | 0.37 | 0.65                          | 0.74 | 1.50E-07 | 3.10E-07 |
| Polyunsaturated to Saturated Fat Ratio    | 1.8               | 0.44   | 0.69                 | 0.4   | 0.98                       | 0.61 | -0.67                         | 0.55 | 5.80E-07 | 1.00E-06 |
| 3-Methylhistidine                         | 0                 | 0      | 19                   | 11    | -0.92                      | 0.22 | 0.63                          | 0.81 | 7.90E-07 | 1.30E-06 |
| CLA trans-10, cis-12                      | 0.0016            | 0.0016 | 0.034                | 0.02  | -0.9                       | 0.36 | 0.62                          | 0.8  | 9.80E-07 | 1.40E-06 |
| Vegetable Protein                         | 79                | 23     | 28                   | 10    | 1                          | 0.7  | -0.72                         | 0.23 | 4.40E-06 | 5.80E-06 |
| SFA 18:0 (stearic acid)                   | 2.5               | 1.3    | 7.2                  | 3.7   | -0.9                       | 0.64 | 0.62                          | 0.68 | 5.70E-06 | 6.90E-06 |
| Cholesterol to Saturated Fatty Acid Index | 15                | 10     | 47                   | 22    | -0.91                      | 0.67 | 0.63                          | 0.64 | 6.70E-06 | 7.50E-06 |
| SFA 4:0 (butyric acid)                    | 0.00091           | 0.003  | 0.84                 | 0.62  | -0.84                      | 0.38 | 0.58                          | 0.87 | 8.80E-06 | 9.10E-06 |

|                                      |         |        |        |       |       |      |       |       |          |          |
|--------------------------------------|---------|--------|--------|-------|-------|------|-------|-------|----------|----------|
|                                      |         |        |        |       |       |      |       |       | 06       | 06       |
| Retinol                              | 91      | 120    | 380    | 210   | -0.83 | 0.39 | 0.57  | 0.88  | 1.20E-05 | 1.20E-05 |
| Phytic Acid                          | 1800    | 780    | 700    | 400   | 0.92  | 0.81 | -0.63 | 0.51  | 4.20E-05 | 3.80E-05 |
| MUFA 14:1 (myristoleic acid)         | 0.00042 | 0.0011 | 0.06   | 0.045 | -0.79 | 0.21 | 0.54  | 0.96  | 5.10E-05 | 4.40E-05 |
| SFA 6:0 (caproic acid)               | 0.044   | 0.062  | 0.44   | 0.33  | -0.77 | 0.4  | 0.53  | 0.94  | 6.50E-05 | 5.20E-05 |
| Magnesium                            | 470     | 160    | 300    | 110   | 0.85  | 0.78 | -0.59 | 0.65  | 7.20E-05 | 5.50E-05 |
| Methionine                           | 1.1     | 0.38   | 2      | 0.79  | -0.8  | 0.67 | 0.55  | 0.8   | 7.60E-05 | 5.50E-05 |
| Lactose                              | 0.15    | 0.22   | 8.6    | 6.7   | -0.76 | 0.17 | 0.52  | 1     | 1.10E-04 | 7.70E-05 |
| % Calories from SFA                  | 6       | 3.7    | 12     | 3     | -0.83 | 0.82 | 0.57  | 0.65  | 1.40E-04 | 9.40E-05 |
| Copper                               | 2.3     | 0.97   | 1.4    | 0.6   | 0.86  | 0.86 | -0.59 | 0.57  | 1.60E-04 | 9.80E-05 |
| TRANS 16:1 (trans-hexadecenoic acid) | 0.0047  | 0.0083 | 0.039  | 0.029 | -0.74 | 0.25 | 0.51  | 1     | 1.60E-04 | 9.80E-05 |
| Soluble Dietary Fiber                | 11      | 5.2    | 5.3    | 2.1   | 0.87  | 0.88 | -0.6  | 0.53  | 1.80E-04 | 1.00E-04 |
| Natural Folate (food folate)         | 450     | 200    | 190    | 64    | 0.91  | 0.92 | -0.63 | 0.37  | 1.80E-04 | 1.00E-04 |
| Lysine                               | 3.4     | 1.4    | 5.9    | 2.3   | -0.76 | 0.68 | 0.52  | 0.85  | 2.20E-04 | 1.20E-04 |
| Vitamin D (calciferol)               | 1.1     | 1.3    | 4.3    | 2.5   | -0.72 | 0.46 | 0.5   | 0.97  | 2.40E-04 | 1.30E-04 |
| Manganese                            | 7       | 3      | 3.4    | 2     | 0.79  | 0.81 | -0.54 | 0.72  | 2.80E-04 | 1.30E-04 |
| Daidzein                             | 22      | 13     | 0.28   | 0.38  | 0.95  | 0.96 | -0.65 | 0.075 | 2.50E-04 | 1.30E-04 |
| Pinitol                              | 0.22    | 0.15   | 0.0068 | 0.012 | 0.93  | 0.97 | -0.64 | 0.19  | 2.90E-04 | 1.30E-04 |
| Pectins                              | 4.3     | 2      | 1.8    | 1     | 0.85  | 0.93 | -0.58 | 0.52  | 3.70E-04 | 1.70E-04 |

|                                         |          |          |       |       |       |      |       |       |          |          |
|-----------------------------------------|----------|----------|-------|-------|-------|------|-------|-------|----------|----------|
|                                         |          |          |       |       |       |      |       |       | 04       | 04       |
| Genistein                               | 29       | 19       | 0.34  | 0.33  | 0.92  | 1    | -0.63 | 0.053 | 5.00E-04 | 2.20E-04 |
| Glycitein                               | 5.5      | 3.8      | 0.016 | 0.031 | 0.91  | 1    | -0.62 | 0.052 | 6.10E-04 | 2.60E-04 |
| Beta-Tocopherol                         | 0.77     | 0.38     | 0.41  | 0.28  | 0.72  | 0.8  | -0.49 | 0.82  | 9.50E-04 | 3.90E-04 |
| Total Dietary Fiber                     | 35       | 18       | 18    | 8.1   | 0.78  | 0.96 | -0.53 | 0.61  | 1.10E-03 | 4.20E-04 |
| Total Saturated Fatty Acids (SFA)       | 15       | 10       | 31    | 15    | -0.74 | 0.92 | 0.51  | 0.7   | 1.20E-03 | 4.90E-04 |
| % Calories from Fat                     | 26       | 5.7      | 34    | 4.8   | -0.77 | 0.99 | 0.53  | 0.58  | 1.30E-03 | 5.10E-04 |
| Maltose                                 | 5.5      | 2.6      | 3     | 2.1   | 0.69  | 0.82 | -0.47 | 0.83  | 1.60E-03 | 5.90E-04 |
| Total Fat                               | 64       | 21       | 86    | 39    | -0.74 | 0.95 | 0.51  | 0.68  | 1.70E-03 | 6.10E-04 |
| Insoluble Dietary Fiber                 | 24       | 13       | 12    | 6.5   | 0.71  | 0.99 | -0.49 | 0.67  | 3.00E-03 | 1.10E-03 |
| Iron                                    | 22       | 8.9      | 15    | 5.7   | 0.69  | 0.98 | -0.47 | 0.72  | 3.60E-03 | 1.20E-03 |
| % Calories from Carbohydrate            | 56       | 7.9      | 46    | 8.4   | 0.64  | 0.91 | -0.44 | 0.82  | 4.90E-03 | 1.70E-03 |
| Total Carbohydrate                      | 300      | 98       | 250   | 81    | 0.59  | 0.87 | -0.4  | 0.89  | 9.10E-03 | 3.00E-03 |
| Total Folate                            | 690      | 440      | 370   | 120   | 0.69  | 1.2  | -0.48 | 0.44  | 9.30E-03 | 3.00E-03 |
| PUFA 22:5 (docosapentaenoic acid [DPA]) | 3.00E-05 | 1.00E-04 | 0.037 | 0.051 | -0.52 | 0.13 | 0.36  | 1.2   | 9.60E-03 | 3.00E-03 |
| PUFA 22:6 (docosahexaenoic acid [DHA])  | 0.0014   | 0.0033   | 0.18  | 0.25  | -0.52 | 0.2  | 0.36  | 1.2   | 9.60E-03 | 3.00E-03 |
| Oxalic Acid                             | 400      | 250      | 180   | 99    | 0.68  | 1.2  | -0.47 | 0.43  | 1.10E-02 | 3.30E-03 |
| Potassium                               | 3000     | 1000     | 2400  | 590   | 0.61  | 1    | -0.42 | 0.75  | 1.20E-02 | 3.60E-03 |
| Alanine                                 | 3.1      | 0.97     | 4.2   | 1.7   | -0.54 | 0.75 | 0.37  | 1     | 1.20E-   | 3.60E-   |

|                                                                              |         |         |       |      |       |      |       |      |          |          |
|------------------------------------------------------------------------------|---------|---------|-------|------|-------|------|-------|------|----------|----------|
|                                                                              |         |         |       |      |       |      |       |      | 02       | 03       |
| Vitamin B-12 (cobalamin)                                                     | 2.4     | 3.6     | 5.4   | 2.5  | -0.57 | 0.94 | 0.39  | 0.86 | 1.30E-02 | 3.80E-03 |
| Vitamin C (ascorbic acid)                                                    | 110     | 53      | 62    | 43   | 0.57  | 0.97 | -0.39 | 0.84 | 1.50E-02 | 4.20E-03 |
| Mannitol                                                                     | 0.5     | 0.42    | 0.17  | 0.12 | 0.64  | 1.2  | -0.44 | 0.48 | 1.60E-02 | 4.40E-03 |
| PUFA 20:5 (eicosapentaenoic acid [EPA])                                      | 0.00045 | 0.00082 | 0.086 | 0.14 | -0.46 | 0.22 | 0.32  | 1.2  | 2.30E-02 | 6.00E-03 |
| Total Alpha-Tocopherol Equivalents                                           | 21      | 19      | 8.9   | 3.9  | 0.62  | 1.3  | -0.43 | 0.38 | 2.40E-02 | 6.20E-03 |
| Histidine                                                                    | 1.8     | 0.62    | 2.4   | 0.93 | -0.51 | 0.9  | 0.35  | 0.93 | 2.40E-02 | 6.20E-03 |
| Vitamin E (Total Alpha-Tocopherol)                                           | 17      | 15      | 7.4   | 3    | 0.6   | 1.3  | -0.42 | 0.37 | 2.90E-02 | 7.00E-03 |
| Dietary Folate Equivalents                                                   | 850     | 620     | 500   | 180  | 0.59  | 1.3  | -0.4  | 0.49 | 2.90E-02 | 7.00E-03 |
| Vitamin E (International Units) (IU)                                         | 27      | 24      | 11    | 4.5  | 0.61  | 1.3  | -0.42 | 0.37 | 2.70E-02 | 7.00E-03 |
| Synthetic Alpha-Tocopherol (all rac-alpha-tocopherol or dl-alpha-tocopherol) | 4.1     | 6.3     | 0     | 0    | 0.6   | 1.3  | -0.41 | 0.38 | 2.90E-02 | 7.10E-03 |
| SFA 14:0 (myristic acid)                                                     | 1.4     | 1.9     | 3     | 1.8  | -0.52 | 1.1  | 0.36  | 0.8  | 3.30E-02 | 7.60E-03 |
| Natural Alpha-Tocopherol (RRR-alpha-tocopherol or d-alpha-tocopherol)        | 15      | 12      | 7.4   | 3    | 0.59  | 1.3  | -0.41 | 0.38 | 3.30E-02 | 7.60E-03 |
| Choline                                                                      | 260     | 110     | 330   | 130  | -0.47 | 0.82 | 0.32  | 1    | 3.40E-02 | 7.70E-03 |
| Threonine                                                                    | 2.6     | 0.87    | 3.4   | 1.4  | -0.46 | 0.86 | 0.32  | 0.99 | 3.90E-02 | 8.50E-03 |
| Valine                                                                       | 3.5     | 1.2     | 4.5   | 1.7  | -0.48 | 0.96 | 0.33  | 0.91 | 3.90E-02 | 8.50E-03 |
| % Calories from Protein                                                      | 14      | 3.8     | 17    | 3.8  | -0.48 | 0.92 | 0.33  | 0.94 | 3.80E-02 | 8.50E-03 |
| MUFA 20:1 (gadoleic acid)                                                    | 0.74    | 0.68    | 0.26  | 0.16 | 0.57  | 1.4  | -0.39 | 0.33 | 4.10E-02 | 8.60E-03 |

|                           |       |       |        |        |       |       |       |       |          |          |
|---------------------------|-------|-------|--------|--------|-------|-------|-------|-------|----------|----------|
|                           |       |       |        |        |       |       |       |       | 02       | 03       |
| Available Carbohydrate    | 260   | 83    | 230    | 77     | 0.46  | 0.87  | -0.32 | 0.98  | 4.00E-02 | 8.60E-03 |
| Isoleucine                | 3.1   | 1.1   | 4      | 1.5    | -0.48 | 0.98  | 0.33  | 0.91  | 4.20E-02 | 8.80E-03 |
| Tyrosine                  | 2.3   | 0.81  | 3.1    | 1.2    | -0.49 | 1     | 0.33  | 0.87  | 4.20E-02 | 8.80E-03 |
| Omega-3 Fatty Acids       | 1.4   | 0.58  | 2.3    | 1.8    | -0.42 | 0.66  | 0.29  | 1.1   | 4.60E-02 | 9.30E-03 |
| Galactose                 | 0.12  | 0.056 | 0.69   | 1      | -0.39 | 0.049 | 0.27  | 1.2   | 4.90E-02 | 9.80E-03 |
| Riboflavin (vitamin B2)   | 1.6   | 0.72  | 2      | 0.64   | -0.46 | 1     | 0.32  | 0.88  | 5.10E-02 | 1.00E-02 |
| Niacin (vitamin B3)       | 20    | 6.5   | 24     | 7.5    | -0.42 | 0.82  | 0.29  | 1     | 5.60E-02 | 1.10E-02 |
| Water                     | 3200  | 1200  | 2500   | 830    | 0.46  | 1     | -0.32 | 0.88  | 5.50E-02 | 1.10E-02 |
| Leucine                   | 5.5   | 1.9   | 6.9    | 2.7    | -0.43 | 0.96  | 0.29  | 0.94  | 6.60E-02 | 1.20E-02 |
| Lutein + Zeaxanthin       | 5900  | 6400  | 1800   | 1800   | 0.51  | 1.4   | -0.35 | 0.4   | 6.70E-02 | 1.20E-02 |
| Niacin Equivalents        | 36    | 7.5   | 41     | 13     | -0.37 | 0.35  | 0.26  | 1.2   | 6.40E-02 | 1.20E-02 |
| Starch                    | 150   | 67    | 130    | 54     | 0.43  | 1     | -0.3  | 0.9   | 7.00E-02 | 1.30E-02 |
| Selenium                  | 110   | 32    | 130    | 49     | -0.37 | 0.61  | 0.25  | 1.1   | 7.90E-02 | 1.40E-02 |
| Xylitol                   | 0.025 | 0.028 | 0.0094 | 0.0088 | 0.48  | 1.3   | -0.33 | 0.55  | 7.50E-02 | 1.40E-02 |
| Vitamin K (phylloquinone) | 270   | 290   | 110    | 89     | 0.47  | 1.4   | -0.32 | 0.46  | 9.10E-02 | 1.60E-02 |
| Biochanin A               | 1.2   | 2     | 0.0063 | 0.025  | 0.49  | 1.5   | -0.34 | 0.018 | 9.10E-02 | 1.60E-02 |
| SFA 20:0 (arachidic acid) | 0.16  | 0.075 | 0.12   | 0.074  | 0.45  | 1.3   | -0.31 | 0.58  | 1.00E-01 | 1.70E-02 |
| Zinc                      | 9.6   | 4.8   | 12     | 5.1    | -0.36 | 0.8   | 0.25  | 1.1   | 1.10E-   | 1.80E-   |



|                                                                                  |          |          |         |         |       |      |       |      |          |          |
|----------------------------------------------------------------------------------|----------|----------|---------|---------|-------|------|-------|------|----------|----------|
|                                                                                  |          |          |         |         |       |      |       |      | 01       | 02       |
| SFA 17:0 (margaric acid)                                                         | 0.31     | 0.36     | 0.12    | 0.075   | 0.45  | 1.4  | -0.31 | 0.28 | 1.10E-01 | 1.90E-02 |
| PUFA 18:4 (parinaric acid)                                                       | 9.10E-05 | 3.00E-04 | 0.017   | 0.043   | -0.32 | 0.2  | 0.22  | 1.3  | 1.10E-01 | 1.90E-02 |
| Beta-Carotene (provitamin A carotenoid)                                          | 5300     | 4300     | 2700    | 3400    | 0.39  | 1.1  | -0.27 | 0.86 | 1.20E-01 | 1.90E-02 |
| Beta-Carotene Equivalents (derived from provitamin A carotenoids)                | 5700     | 4700     | 3000    | 3600    | 0.38  | 1.1  | -0.26 | 0.84 | 1.30E-01 | 2.00E-02 |
| Glycine                                                                          | 3.1      | 0.97     | 3.8     | 1.5     | -0.35 | 0.81 | 0.24  | 1.1  | 1.20E-01 | 2.00E-02 |
| Ash                                                                              | 20       | 5.3      | 19      | 6.3     | 0.33  | 0.76 | -0.23 | 1.1  | 1.30E-01 | 2.10E-02 |
| Formononetin                                                                     | 0.019    | 0.044    | 0.00042 | 0.00097 | 0.42  | 1.4  | -0.29 | 0.39 | 1.40E-01 | 2.10E-02 |
| TRANS 18:2 (trans-octadecadienoic acid [linolelaidic acid]; incl. c-t, t-c, t-t) | 0.32     | 0.25     | 0.51    | 0.38    | -0.34 | 0.89 | 0.23  | 1    | 1.40E-01 | 2.20E-02 |
| Betaine                                                                          | 310      | 200      | 220     | 110     | 0.39  | 1.3  | -0.27 | 0.67 | 1.40E-01 | 2.20E-02 |
| Tagatose                                                                         | 0        | 0        | 0.96    | 2.4     | -0.3  | 0.31 | 0.2   | 1.3  | 1.40E-01 | 2.20E-02 |
| MUFA 18:1 (oleic acid)                                                           | 23       | 10       | 27      | 13      | -0.32 | 1.1  | 0.22  | 0.91 | 1.90E-01 | 2.80E-02 |
| SFA 12:0 (lauric acid)                                                           | 3.4      | 4.8      | 1.4     | 1.9     | 0.36  | 1.4  | -0.24 | 0.54 | 2.00E-01 | 2.90E-02 |
| SFA 22:0 (behenic acid)                                                          | 0.13     | 0.13     | 0.076   | 0.068   | 0.35  | 1.3  | -0.24 | 0.65 | 1.90E-01 | 2.90E-02 |
| PUFA 18:3 (linolenic acid)                                                       | 1.4      | 0.58     | 2       | 1.9     | -0.28 | 0.76 | 0.19  | 1.1  | 2.00E-01 | 2.90E-02 |
| % Calories from MUFA                                                             | 10       | 2.9      | 12      | 2.2     | -0.33 | 1.2  | 0.23  | 0.79 | 2.00E-01 | 2.90E-02 |
| Glycemic Load (glucose reference)                                                | 150      | 52       | 140     | 51      | 0.3   | 1    | -0.21 | 0.94 | 2.10E-01 | 2.90E-02 |
| Glycemic Load (bread reference)                                                  | 220      | 75       | 190     | 73      | 0.3   | 1    | -0.21 | 0.94 | 2.10E-01 | 2.90E-02 |
| Sorbitol                                                                         | 0.61     | 1.2      | 0.15    | 0.26    | 0.35  | 1.4  | -0.24 | 0.44 | 2.10E-01 | 3.00E-02 |

|                                                     |         |        |        |         |       |      |       |      |          |          |
|-----------------------------------------------------|---------|--------|--------|---------|-------|------|-------|------|----------|----------|
|                                                     |         |        |        |         |       |      |       |      | 01       | 02       |
| Total Vitamin A Activity (International Units) (IU) | 9800    | 8000   | 6300   | 6200    | 0.31  | 1.2  | -0.21 | 0.85 | 2.20E-01 | 3.10E-02 |
| Thiamin (vitamin B1)                                | 1.9     | 0.89   | 1.7    | 0.6     | 0.3   | 1.2  | -0.21 | 0.8  | 2.40E-01 | 3.20E-02 |
| Coumestrol                                          | 0.013   | 0.026  | 0.18   | 0.56    | -0.23 | 0.13 | 0.15  | 1.3  | 2.60E-01 | 3.50E-02 |
| SFA 10:0 (capric acid)                              | 0.44    | 0.61   | 0.69   | 0.47    | -0.28 | 1.2  | 0.19  | 0.8  | 2.80E-01 | 3.70E-02 |
| Total Protein                                       | 79      | 23     | 89     | 33      | -0.23 | 0.99 | 0.16  | 1    | 3.20E-01 | 4.30E-02 |
| Total Monounsaturated Fatty Acids (MUFA)            | 26      | 9.8    | 29     | 13      | -0.24 | 1.1  | 0.17  | 0.94 | 3.20E-01 | 4.30E-02 |
| Sodium                                              | 3300    | 1100   | 3800   | 1700    | -0.21 | 0.99 | 0.15  | 1    | 3.70E-01 | 4.70E-02 |
| Alpha-Carotene (provitamin A carotenoid)            | 740     | 1100   | 410    | 700     | 0.24  | 1.3  | -0.16 | 0.77 | 3.60E-01 | 4.70E-02 |
| Synthetic Folate (folic acid)                       | 240     | 260    | 180    | 95      | 0.25  | 1.4  | -0.17 | 0.65 | 3.60E-01 | 4.70E-02 |
| Fructose                                            | 17      | 9.1    | 22     | 19      | -0.17 | 0.52 | 0.12  | 1.2  | 4.00E-01 | 5.10E-02 |
| % Calories from PUFA                                | 7.7     | 1.5    | 7.1    | 2.8     | 0.19  | 0.85 | -0.13 | 1.1  | 4.10E-01 | 5.10E-02 |
| Sucrose                                             | 38      | 22     | 32     | 22      | 0.2   | 1    | -0.14 | 0.99 | 4.10E-01 | 5.20E-02 |
| Vitamin B-6 (pyridoxine, pyridoxyl, & pyridoxamine) | 2       | 1.5    | 1.8    | 0.56    | 0.22  | 1.4  | -0.15 | 0.58 | 4.30E-01 | 5.20E-02 |
| MUFA 22:1 (erucic acid)                             | 0.036   | 0.054  | 0.07   | 0.16    | -0.17 | 0.48 | 0.11  | 1.2  | 4.20E-01 | 5.20E-02 |
| Inositol                                            | 0.14    | 0.094  | 0.11   | 0.13    | 0.18  | 0.76 | -0.12 | 1.1  | 4.20E-01 | 5.20E-02 |
| Delta-Tocopherol                                    | 3.6     | 2.4    | 3.1    | 2.9     | 0.18  | 0.97 | -0.12 | 1    | 4.50E-01 | 5.50E-02 |
| Added Sugars                                        | 49      | 24     | 60     | 47      | -0.16 | 0.64 | 0.11  | 1.2  | 4.60E-01 | 5.50E-02 |
| Erythritol                                          | 0.00076 | 0.0014 | 4.00E- | 0.00088 | 0.19  | 1.3  | -0.13 | 0.79 | 4.60E-   | 5.50E-   |

|                                                     |      |      |      |      |       |      |       |      |          |          |
|-----------------------------------------------------|------|------|------|------|-------|------|-------|------|----------|----------|
|                                                     |      |      | 04   |      |       |      |       |      | 01       | 02       |
| Lycopene                                            | 8100 | 8600 | 6000 | 5500 | 0.18  | 1.2  | -0.13 | 0.81 | 4.80E-01 | 5.70E-02 |
| Alcohol                                             | 15   | 27   | 9.5  | 17   | 0.16  | 1.3  | -0.11 | 0.78 | 5.30E-01 | 6.00E-02 |
| Glucose                                             | 19   | 8.8  | 22   | 15   | -0.13 | 0.61 | 0.09  | 1.2  | 5.40E-01 | 6.00E-02 |
| Calcium                                             | 840  | 280  | 930  | 430  | -0.14 | 0.69 | 0.097 | 1.2  | 5.20E-01 | 6.00E-02 |
| Aspartic Acid                                       | 6.9  | 2.6  | 7.5  | 2.8  | -0.15 | 1.1  | 0.1   | 0.96 | 5.40E-01 | 6.00E-02 |
| Glutamic Acid                                       | 18   | 6.1  | 17   | 6.3  | 0.17  | 1.2  | -0.12 | 0.83 | 5.10E-01 | 6.00E-02 |
| Proline                                             | 5.5  | 2    | 6.1  | 2.4  | -0.16 | 1.2  | 0.11  | 0.87 | 5.30E-01 | 6.00E-02 |
| Total Trans-Fatty Acids (TRANS)                     | 2.4  | 2.1  | 3    | 2.1  | -0.17 | 1.2  | 0.11  | 0.89 | 5.10E-01 | 6.00E-02 |
| Beta-Cryptoxanthin (provitamin A carotenoid)        | 99   | 80   | 150  | 260  | -0.14 | 0.63 | 0.093 | 1.2  | 5.30E-01 | 6.00E-02 |
| % Calories from Alcohol                             | 3.9  | 6.7  | 2.6  | 4.4  | 0.15  | 1.3  | -0.1  | 0.81 | 5.60E-01 | 6.10E-02 |
| Total Vitamin A Activity (Retinol Equivalents)      | 1000 | 810  | 880  | 670  | 0.15  | 1.2  | -0.1  | 0.87 | 5.50E-01 | 6.10E-02 |
| SFA 8:0 (caprylic acid)                             | 0.55 | 0.77 | 0.41 | 0.34 | 0.16  | 1.4  | -0.11 | 0.61 | 5.70E-01 | 6.20E-02 |
| Pantothenic Acid                                    | 4.5  | 1.8  | 4.8  | 1.6  | -0.12 | 0.89 | 0.081 | 1.1  | 6.10E-01 | 6.50E-02 |
| Caffeine                                            | 74   | 74   | 90   | 78   | -0.12 | 0.92 | 0.081 | 1.1  | 6.10E-01 | 6.50E-02 |
| TRANS 18:1 (trans-octadecenoic acid [elaidic acid]) | 2    | 1.8  | 2.4  | 1.7  | -0.13 | 1.2  | 0.087 | 0.87 | 6.20E-01 | 6.50E-02 |
| Total Sugars                                        | 80   | 28   | 88   | 50   | -0.11 | 0.58 | 0.073 | 1.2  | 6.20E-01 | 6.50E-02 |
| Glycemic Index (glucose reference)                  | 58   | 8.2  | 59   | 3.3  | -0.14 | 1.4  | 0.097 | 0.6  | 6.10E-01 | 6.50E-02 |
| Glycemic Index (bread reference)                    | 82   | 12   | 84   | 4.8  | -0.14 | 1.4  | 0.097 | 0.6  | 6.10E-01 | 6.50E-02 |

|                                                         |         |          |         |         |        |      |        |      |          |          |
|---------------------------------------------------------|---------|----------|---------|---------|--------|------|--------|------|----------|----------|
|                                                         |         |          |         |         |        |      |        |      | 01       | 02       |
| Tryptophan                                              | 0.95    | 0.32     | 1       | 0.38    | -0.11  | 1.1  | 0.073  | 0.94 | 6.70E-01 | 6.90E-02 |
| Serine                                                  | 3.7     | 1.2      | 4       | 1.5     | -0.099 | 1.2  | 0.068  | 0.89 | 7.00E-01 | 7.10E-02 |
| Nitrogen                                                | 13      | 3.8      | 14      | 5.2     | -0.096 | 1.1  | 0.066  | 0.98 | 6.90E-01 | 7.10E-02 |
| Acesulfame Potassium                                    | 2.9     | 9.5      | 1.8     | 5.1     | 0.091  | 1.3  | -0.062 | 0.72 | 7.40E-01 | 7.40E-02 |
| Gamma-Tocopherol                                        | 13      | 6.3      | 13      | 9.7     | 0.072  | 0.86 | -0.05  | 1.1  | 7.50E-01 | 7.50E-02 |
| Total Vitamin A Activity (Retinol Activity Equivalents) | 570     | 420      | 630     | 390     | -0.08  | 1.2  | 0.055  | 0.91 | 7.50E-01 | 7.50E-02 |
| Phosphorus                                              | 1200    | 400      | 1300    | 480     | -0.057 | 0.62 | 0.039  | 1.2  | 7.90E-01 | 7.70E-02 |
| Cystine                                                 | 1.3     | 0.44     | 1.3     | 0.52    | 0.068  | 1.1  | -0.047 | 0.97 | 7.80E-01 | 7.70E-02 |
| Arginine                                                | 4.7     | 1.8      | 4.7     | 1.8     | 0.065  | 1.2  | -0.044 | 0.9  | 8.00E-01 | 7.70E-02 |
| Energy (kj)                                             | 8800    | 2300     | 9000    | 3000    | -0.058 | 0.86 | 0.04   | 1.1  | 8.00E-01 | 7.70E-02 |
| Maltitol                                                | 0.00012 | 4.00E-04 | 0.00017 | 0.00052 | -0.058 | 0.87 | 0.04   | 1.1  | 8.00E-01 | 7.70E-02 |
| PUFA 18:2 (linoleic acid)                               | 16      | 5.2      | 16      | 11      | 0.039  | 0.69 | -0.026 | 1.2  | 8.60E-01 | 8.20E-02 |
| Total Polyunsaturated Fatty Acids (PUFA)                | 18      | 5.6      | 19      | 13      | -0.035 | 0.68 | 0.024  | 1.2  | 8.70E-01 | 8.30E-02 |
| Phenylalanine                                           | 3.7     | 1.3      | 3.9     | 1.4     | -0.035 | 1.2  | 0.024  | 0.87 | 8.90E-01 | 8.30E-02 |
| Aspartame                                               | 15      | 49       | 12      | 33      | 0.039  | 1.3  | -0.027 | 0.81 | 8.80E-01 | 8.30E-02 |

| Table S2                          | Wilcoxon rank sum test |        | Fisher's exact test |        |
|-----------------------------------|------------------------|--------|---------------------|--------|
|                                   | pvalue                 | qvalue | pvalue              | qvalue |
| Firmicutes__Ruminococcus_         | 0.004                  | 0.200  | 0.002               | 0.190  |
| Firmicutes_rc4_4                  | 0.011                  | 0.200  | 0.014               | 0.300  |
| Firmicutes_Faecalibacterium       | 0.012                  | 0.200  | 0.180               | 1.000  |
| Firmicutes_Holdemania             | 0.013                  | 0.200  | 0.014               | 0.300  |
| Firmicutes_Dialister              | 0.014                  | 0.200  | 0.009               | 0.300  |
| Firmicutes_Oscillospira           | 0.015                  | 0.200  | 1.000               | 1.000  |
| Firmicutes_Roseburia              | 0.020                  | 0.210  | 0.230               | 1.000  |
| TM7_TM7_3                         | 0.022                  | 0.210  | 0.039               | 0.540  |
| Bacteroidetes_Parabacteroides     | 0.025                  | 0.210  | 0.600               | 1.000  |
| Actinobacteria_Actinomyces        | 0.027                  | 0.210  | 0.045               | 0.540  |
| Proteobacteria_RF32               | 0.042                  | 0.300  | 0.039               | 0.540  |
| Proteobacteria_Oxalobacter        | 0.050                  | 0.320  | 0.072               | 0.760  |
| Firmicutes_SMB53                  | 0.053                  | 0.320  | 0.100               | 0.800  |
| Proteobacteria_Haemophilus        | 0.061                  | 0.340  | 0.090               | 0.760  |
| Firmicutes_Ruminococcaceae        | 0.093                  | 0.480  | 1.000               | 1.000  |
| Firmicutes_Clostridiaceae         | 0.110                  | 0.530  | 0.240               | 1.000  |
| Actinobacteria_Collinsella        | 0.130                  | 0.530  | 0.160               | 1.000  |
| Firmicutes_Mogibacterium          | 0.140                  | 0.530  | 0.210               | 1.000  |
| Firmicutes_Peptococcaceae         | 0.140                  | 0.530  | 0.210               | 1.000  |
| Proteobacteria_Enterobacteriaceae | 0.140                  | 0.530  | 0.210               | 1.000  |
| Cyanobacteria_YS2                 | 0.150                  | 0.560  | 0.180               | 1.000  |
| Firmicutes_Clostridiales          | 0.190                  | 0.560  | 1.000               | 1.000  |
| Firmicutes_Megasphaera            | 0.190                  | 0.560  | 0.490               | 1.000  |
| Firmicutes__Eubacterium_          | 0.200                  | 0.560  | 0.270               | 1.000  |
| Firmicutes_Peptostreptococcaceae  | 0.210                  | 0.560  | 0.320               | 1.000  |
| Proteobacteria_Bilophila          | 0.240                  | 0.560  | 0.340               | 1.000  |
| Proteobacteria_Sutterella         | 0.240                  | 0.560  | 0.090               | 0.760  |
| Bacteroidetes_Butyricimonas       | 0.280                  | 0.560  | 0.300               | 1.000  |
| Firmicutes_Lactobacillus          | 0.290                  | 0.560  | 0.320               | 1.000  |
| Firmicutes_Megamonas              | 0.290                  | 0.560  | 0.320               | 1.000  |
| Actinobacteria_Corynebacterium    | 0.320                  | 0.560  | 0.470               | 1.000  |
| Bacteria                          | 0.320                  | 0.560  | 0.470               | 1.000  |
| Firmicutes                        | 0.320                  | 0.560  | 0.470               | 1.000  |
| Firmicutes_EtOH8                  | 0.320                  | 0.560  | 0.470               | 1.000  |
| Firmicutes_SHA_98                 | 0.320                  | 0.560  | 0.470               | 1.000  |
| Fusobacteria_Leptotrichia         | 0.320                  | 0.560  | 0.470               | 1.000  |
| TM7_F16                           | 0.320                  | 0.560  | 0.470               | 1.000  |
| Verrucomicrobia_Akkermansia       | 0.320                  | 0.560  | 0.470               | 1.000  |
| Bacteroidetes_Bacteroides         | 0.330                  | 0.560  | 1.000               | 1.000  |
| Firmicutes_Clostridium            | 0.330                  | 0.560  | 0.660               | 1.000  |

|                                    |       |       |       |       |
|------------------------------------|-------|-------|-------|-------|
| Firmicutes_Lachnospiraceae         | 0.350 | 0.560 | 1.000 | 1.000 |
| Firmicutes_Phascalactobacterium    | 0.360 | 0.560 | 0.240 | 1.000 |
| Firmicutes_Streptococcus           | 0.380 | 0.560 | 0.470 | 1.000 |
| Bacteroidetes__Paraprevotellaceae_ | 0.390 | 0.560 | 1.000 | 1.000 |
| Bacteroidetes__Prevotella_         | 0.390 | 0.560 | 1.000 | 1.000 |
| Firmicutes__Clostridium_           | 0.390 | 0.560 | 1.000 | 1.000 |
| Firmicutes_Bulleidia               | 0.390 | 0.560 | 1.000 | 1.000 |
| Firmicutes_Catenibacterium         | 0.390 | 0.560 | 1.000 | 1.000 |
| Firmicutes_Christensenella         | 0.390 | 0.560 | 1.000 | 1.000 |
| Firmicutes_Enterococcus            | 0.390 | 0.560 | 1.000 | 1.000 |
| Firmicutes_Granulicatella          | 0.390 | 0.560 | 1.000 | 1.000 |
| Fusobacteria_Cetobacterium         | 0.390 | 0.560 | 1.000 | 1.000 |
| Proteobacteria_Succinivibrio       | 0.390 | 0.560 | 1.000 | 1.000 |
| TM7_CW040                          | 0.390 | 0.560 | 1.000 | 1.000 |
| Actinobacteria_Coriobacteriaceae   | 0.400 | 0.570 | 0.600 | 1.000 |
| Firmicutes_Dorea                   | 0.430 | 0.590 | 0.320 | 1.000 |
| Firmicutes_Turicibacter            | 0.430 | 0.590 | 0.440 | 1.000 |
| Bacteroidetes_Bacteroidales        | 0.460 | 0.610 | 1.000 | 1.000 |
| Tenericutes_ML615J_28              | 0.540 | 0.720 | 0.640 | 1.000 |
| Firmicutes_Blautia                 | 0.580 | 0.750 | 1.000 | 1.000 |
| Bacteroidetes_Prevotella           | 0.590 | 0.750 | 1.000 | 1.000 |
| Firmicutes_Acidaminococcus         | 0.590 | 0.750 | 0.690 | 1.000 |
| Firmicutes_cc_115                  | 0.600 | 0.750 | 1.000 | 1.000 |
| Firmicutes_Anaerotruncus           | 0.660 | 0.810 | 1.000 | 1.000 |
| Firmicutes_Anaerostipes            | 0.710 | 0.860 | 1.000 | 1.000 |
| Firmicutes_Coprobacillus           | 0.720 | 0.860 | 1.000 | 1.000 |
| Firmicutes__Mogibacteriaceae_      | 0.740 | 0.860 | 0.730 | 1.000 |
| Unassigned                         | 0.760 | 0.860 | 1.000 | 1.000 |
| Actinobacteria_Adlercreutzia       | 0.770 | 0.860 | 1.000 | 1.000 |
| Firmicutes_Erysipelotrichaceae     | 0.790 | 0.860 | 1.000 | 1.000 |
| Firmicutes_Ruminococcus            | 0.790 | 0.860 | 0.490 | 1.000 |
| Bacteroidetes__Barnesiellaceae_    | 0.800 | 0.860 | 0.720 | 1.000 |
| Firmicutes_Christensenellaceae     | 0.840 | 0.900 | 1.000 | 1.000 |
| Bacteroidetes_Odoribacter          | 0.850 | 0.900 | 1.000 | 1.000 |
| Actinobacteria_Atopobium           | 0.860 | 0.900 | 1.000 | 1.000 |
| Firmicutes_Lachnospira             | 0.880 | 0.910 | 0.670 | 1.000 |
| Bacteroidetes_Rikenellaceae        | 0.920 | 0.920 | 0.470 | 1.000 |
| Firmicutes_Veillonella             | 0.930 | 0.920 | 1.000 | 1.000 |
| Firmicutes_Coprococcus             | 0.980 | 0.920 | 0.470 | 1.000 |
| Bacteroidetes_S24_7                | 1.000 | 0.920 | 1.000 | 1.000 |
| Firmicutes_Dehalobacterium         | 1.000 | 0.920 | 1.000 | 1.000 |
| Firmicutes_Gemella                 | 1.000 | 0.920 | 1.000 | 1.000 |

|                              |       |       |       |       |
|------------------------------|-------|-------|-------|-------|
| Firmicutes_Gemellaceae       | 1.000 | 0.920 | 1.000 | 1.000 |
| Fusobacteria_Fusobacterium   | 1.000 | 0.920 | 1.000 | 1.000 |
| Proteobacteria_Campylobacter | 1.000 | 0.920 | 1.000 | 1.000 |

---

**Table S3.** Dietary intake of macronutrients and fecal short chain fatty acid levels in vegan-omnivore and CAFE study subjects as well as in two previously published studies comparing these parameters in residents of agrarian vs. Western societies.

| Study                               | Diet                           | Energy (kcal) <sup>†</sup> | Pro (g) <sup>†</sup> | Fat (g) <sup>†</sup> | Carb (g) <sup>†</sup> | Starch (g) <sup>†</sup> | Fiber (g) <sup>†</sup> | Sugars (g) <sup>†</sup> | Acetate (μM/g) # | Propionate (μM/g) # | Butyrate (μM/g) # |
|-------------------------------------|--------------------------------|----------------------------|----------------------|----------------------|-----------------------|-------------------------|------------------------|-------------------------|------------------|---------------------|-------------------|
| Vegan-Omnivore                      | Vegan (N=11)                   | 2100.9 (555.9)             | 79.1 (22.9)          | 63.8 (20.5)          | 296.9 (98.3)          | 154.4 (67.0)            | 35.3* (18.3)           | 79.6 (27.5)             | 43.9 (4.7)       | 15.6 (3.0)          | 14.0 (2.3)        |
|                                     | Omnivore (N=16)                | 2156.6 (727.0)             | 89.1 (33.0)          | 86.3 (39.1)          | 246.5 (81.2)          | 125.2 (53.5)            | 17.5 (8.1)             | 87.8 (50.0)             | 56.3 (5.3)       | 19.3 (2.4)          | 13.7 (1.4)        |
| CAFE                                | High Fiber Low Fat (N=5)       | 2511.9 (579.9)             | 113.1 (25.2)         | 37.0* (8.7)          | 456.5* (105.5)        | 96.0 (24.3)             | 48.7* (10.7)           | 285.3* (64.5)           | 56.5 (12.0)      | 18.5 (2.3)          | 9.13 (2.8)        |
|                                     | Low Fiber High Fat (N=5)       | 2227.7 (443.7)             | 144.4 (29.2)         | 94.8 (19.6)          | 205.6 (38.8)          | 72.5 (13.0)             | 21.5 (4.0)             | 103.1 (20.7)            | 54.2 (11.5)      | 22.1 (4.4)          | 14.2 (4.7)        |
| Ou (Ou et al., 2013)                | Native African (N=18)          | 1669* (160)                | 58* (4)              | 38* (3)              | 282 (28)              | n/a                     | 17 (2)                 | n/a                     | 71.1* (11.9)     | 26.9* (5.6)         | 16.7* (3.3)       |
|                                     | African American (N=17)        | 2650 (230)                 | 94 (9)               | 114 (11)             | 312 (27)              | n/a                     | 20 (1.5)               | n/a                     | 26.3 (3.0)       | 7.9 (1.2)           | 8.5 (2.2)         |
| DeFilippo (De Filippo et al., 2010) | Burkina Faso, age 2-6 y (N=11) | 996.1                      | 40.2                 | 31.3                 | 148.7                 | 134.4                   | 14.3                   | 0                       | 34.7 (4.4)       | 22.9* (7.3)         | 9.3* (1.9)        |
|                                     | Italy, age 2-6 years (N=11)    | 1512.7                     | 66.7                 | 73.9                 | 137.6                 | 119.2                   | 8.4                    | 10                      | 20.9 (2.7)       | 6.2 (1.2)           | 2.5 (0.5)         |

<sup>†</sup> Average daily consumption and standard deviation

# Mean and standard error of mean

\*P<0.01, Vegans vs. Omnivores; High Fiber Low Fat vs. Low Fiber High Fat in Café; Native African vs. African American in Ou; Burkina Faso vs. Italy in De Filippo

**Table S4.** Hydrogen and methane breath testing in omnivores and vegans (PPM: parts per million).

|                                     | Vegans (n=12)<br>Median (range) | Omnivores (n=6)<br>Median (range) | Ranksum<br>p value |
|-------------------------------------|---------------------------------|-----------------------------------|--------------------|
| <b>Methane</b>                      |                                 |                                   |                    |
| Baseline (PPM)                      | 2 (1 - 6)                       | 1 (1 - 2)                         | 0.19               |
| Peak (PPM)                          | 7.5 (3 - 72)                    | 6.5 (4 - 10)                      | >0.99              |
| Time to peak (minutes)              | 165 (120 - 180)                 | 165 (150 - 180)                   | 0.62               |
| <b>Hydrogen</b>                     |                                 |                                   |                    |
| Baseline (PPM)                      | 4 (0 - 23)                      | 2 (0 - 15)                        | 0.67               |
| Peak (PPM)                          | 54.5 (19 - 107)                 | 70 (34 - 123)                     | 0.71               |
| Time to peak (minutes)              | 157.5 (90 - 180)                | 165 (150 - 180)                   | 0.38               |
| <b>Ratio of peak H2 to peak CH4</b> | 9.1 (1.3 - 11.4)                | 10.1 (8.2 - 12.3)                 | 0.16               |



**Table S5.** Fecal Short Chain Fatty Acid (SCFA) levels in omnivore vs. vegans as well as in the controlled feeding experiment (CAFÉ). LFD = Low fiber diet, HFD = High fiber diet, Mean (SEM).

| <b>Study/Sample</b>   | <b>Mean Acetate<br/>(<math>\mu\text{M/g Stool}</math>)</b> | <b>Mean Propionate<br/>(<math>\mu\text{M/g Stool}</math>)</b> | <b>Mean Butyrate<br/>(<math>\mu\text{M/g Stool}</math>)</b> |
|-----------------------|------------------------------------------------------------|---------------------------------------------------------------|-------------------------------------------------------------|
| <b>CAFÉ (D0 LFD)</b>  | 51.4 (6.6)                                                 | 21.9 (5.2)                                                    | 13.3 (2.7)                                                  |
| <b>CAFÉ (D10 LFD)</b> | 54.2 (11.5)                                                | 22.1 (4.4)                                                    | 14.2 (4.7)                                                  |
| p value               | 0.84                                                       | 0.98                                                          | 0.87                                                        |
| <b>CAFÉ (D0 HFD)</b>  | 64.6 (11.3)                                                | 18.9 (2.1)                                                    | 12.8 (2.8)                                                  |
| <b>CAFÉ (D10 HFD)</b> | 56.5 (12.0)                                                | 18.5 (2.3)                                                    | 9.1 (2.8)                                                   |
| p value               | 0.64                                                       | 0.89                                                          | 0.38                                                        |
